# Supplementary material for: Comparison of different cell type correction methods for genome-scale epigenetics studies
Source: PubMed Central journal article supplement (PMC5391562; doi:10.1186/s12859-017-1611-2), 2017-04-14
Supplement: 12859_2017_1611_MOESM1_ESM.pdf [file 12859_2017_1611_MOESM1_ESM.pdf]

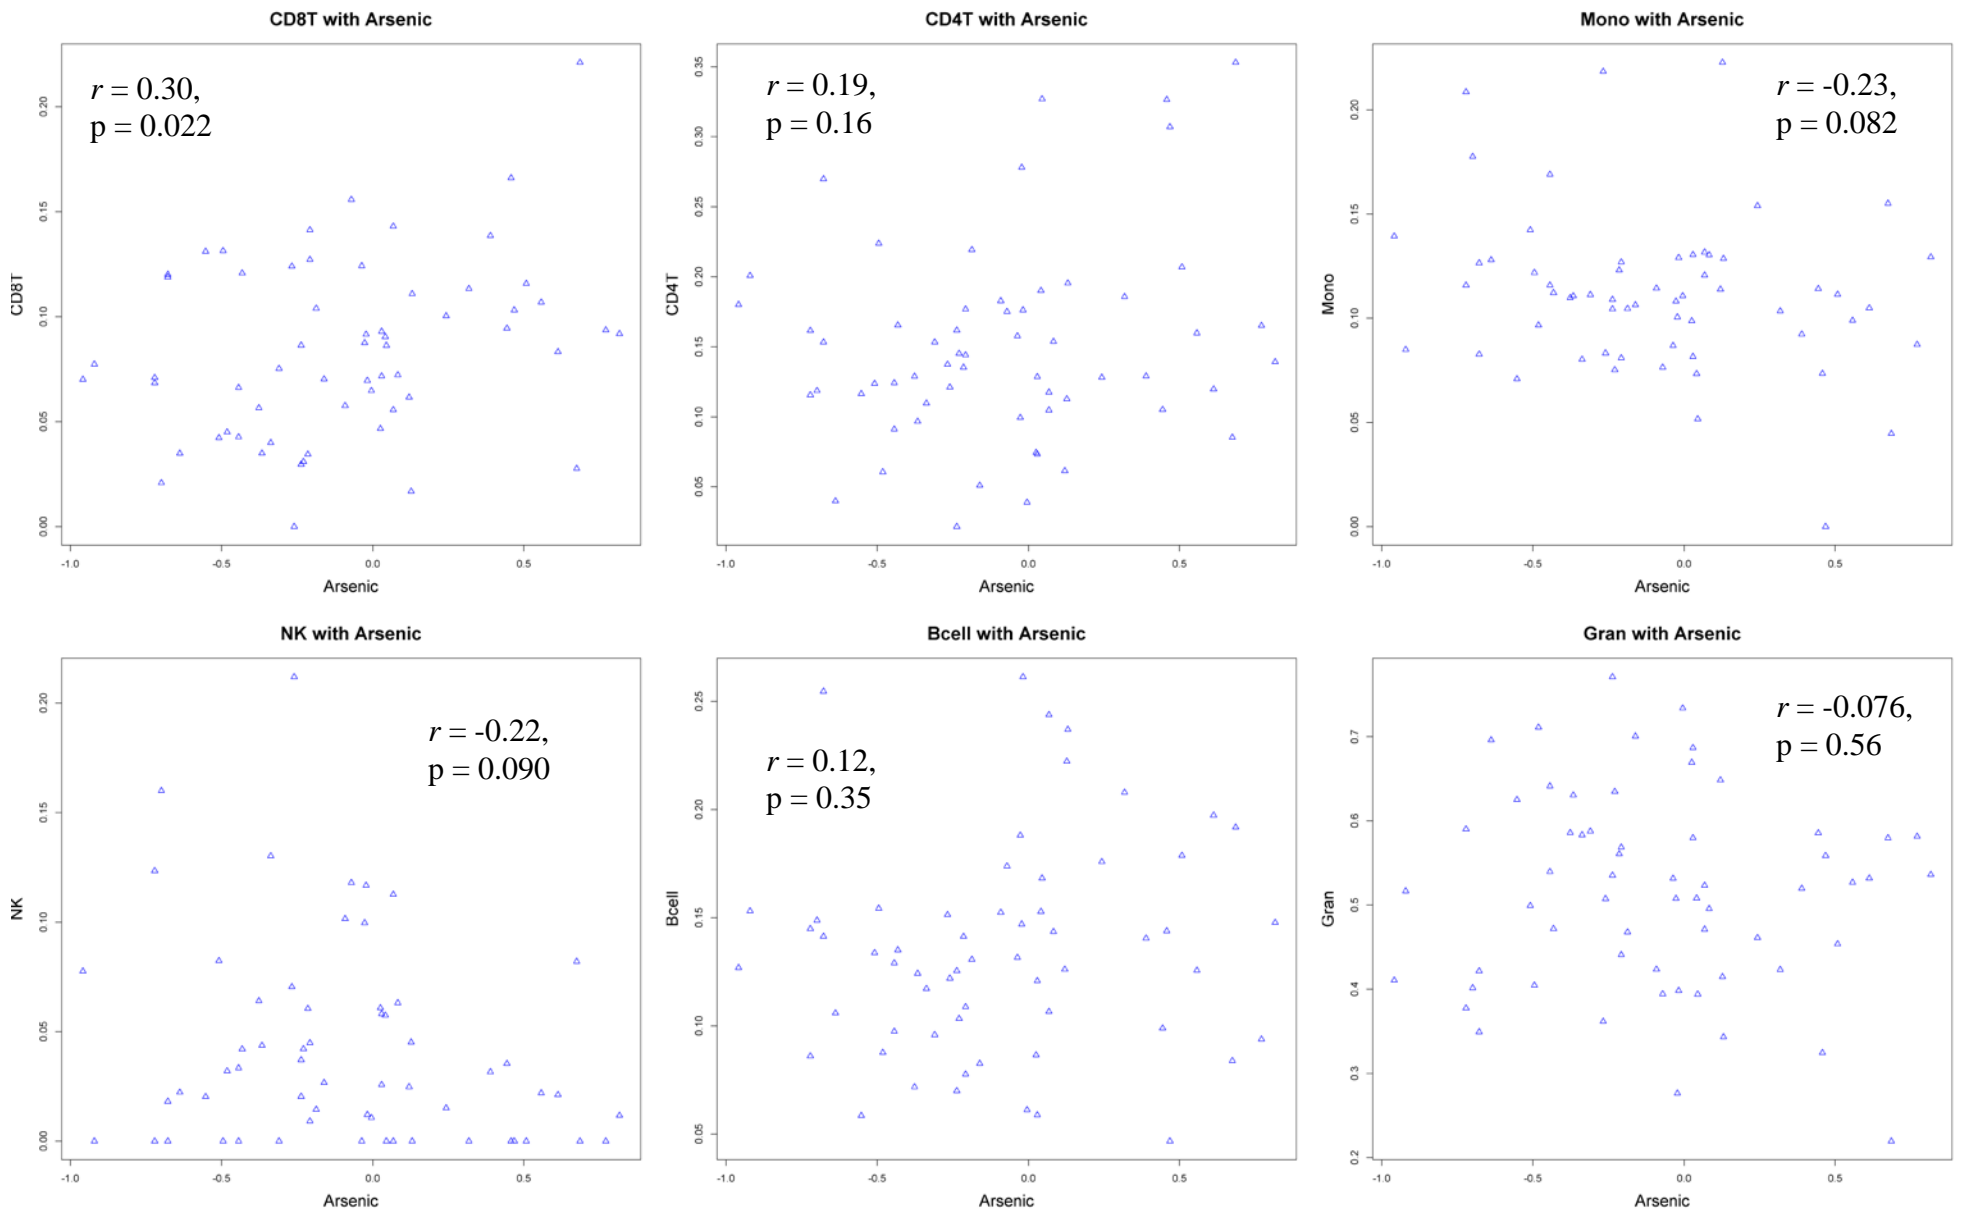

Figure A. Pearson correlations between **inorganic arsenic levels** (in log10 scale) and cell type proportions

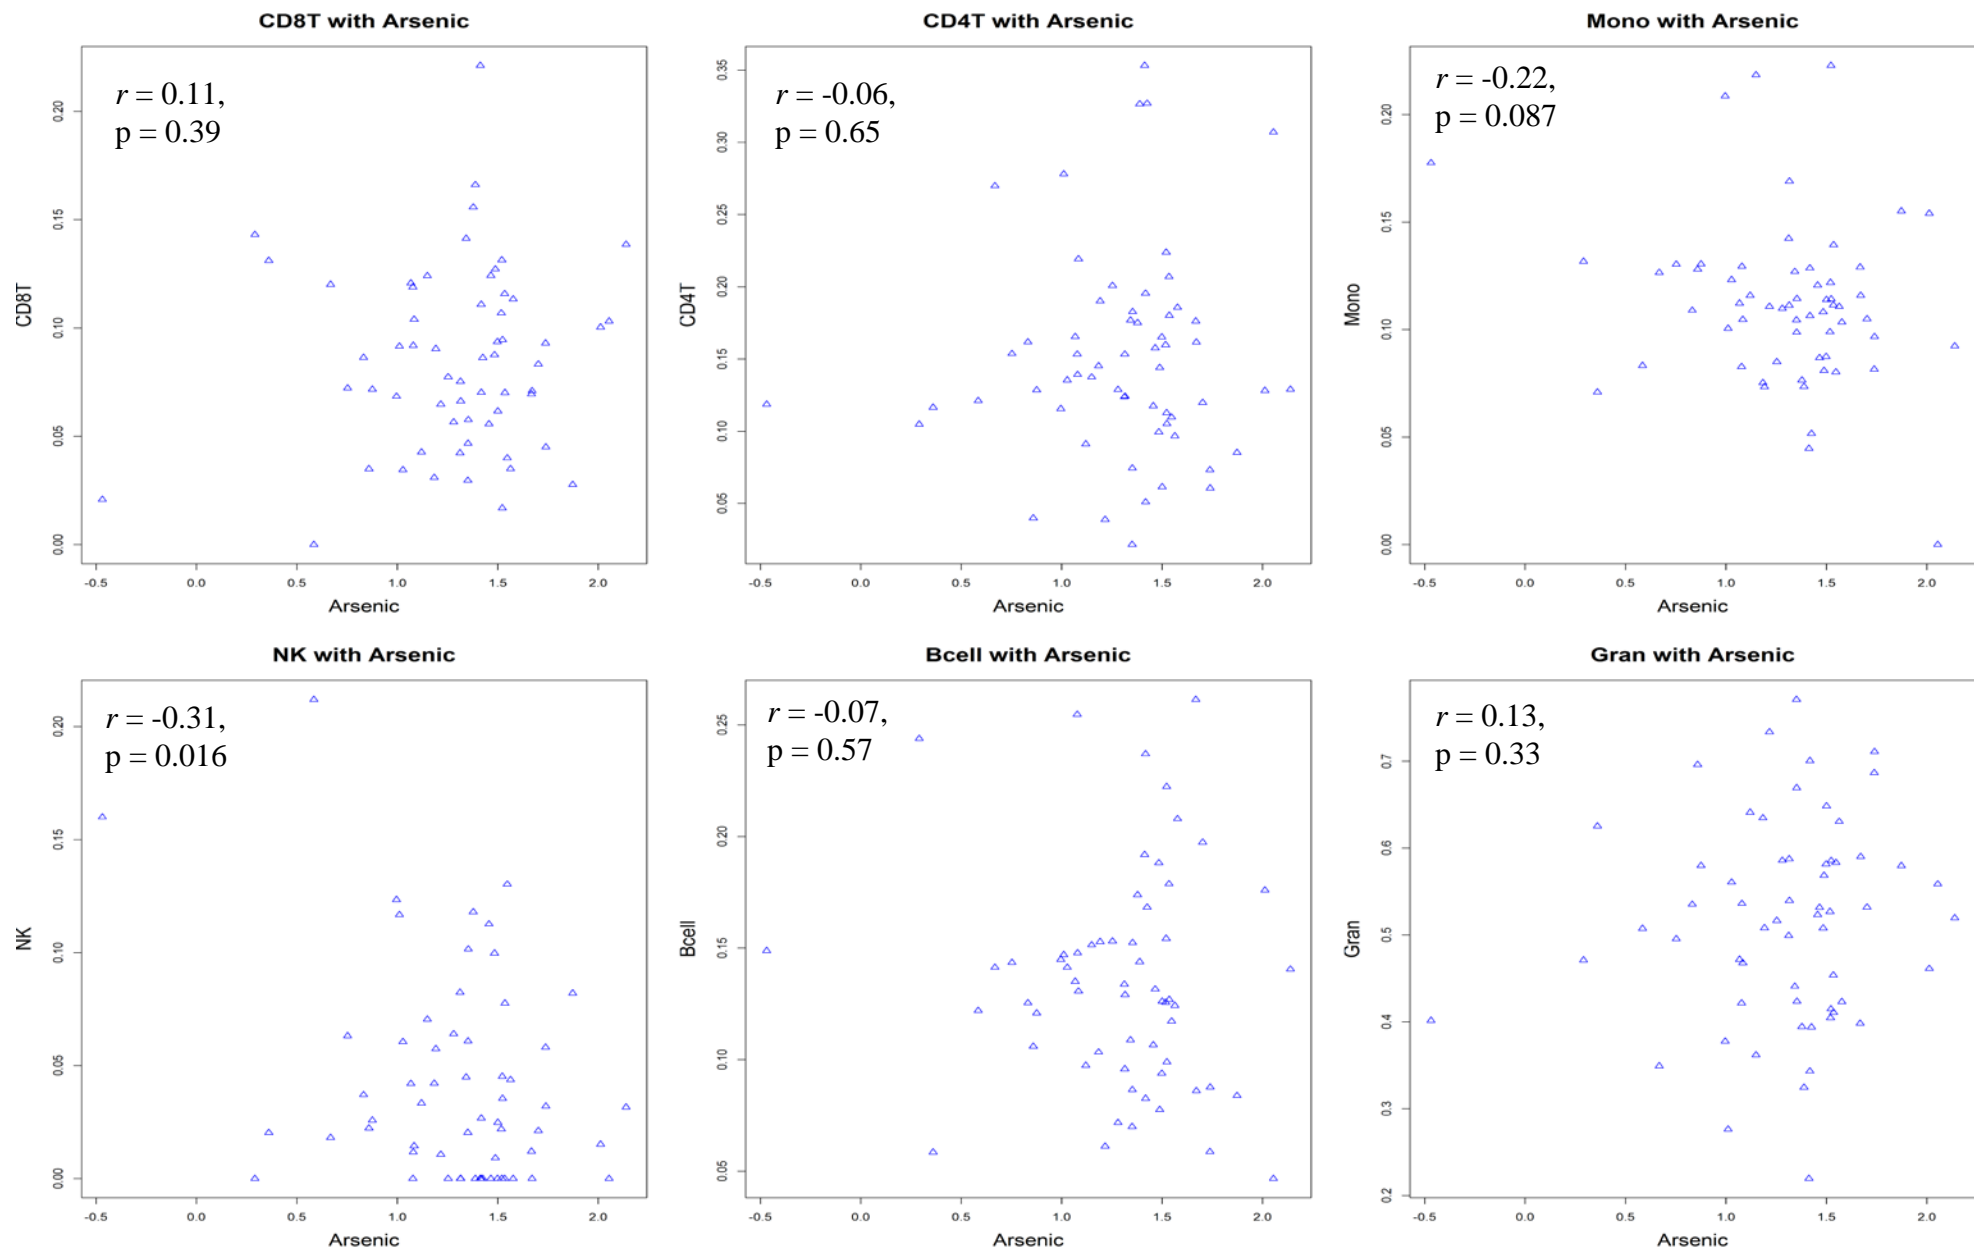

Figure B. Pearson correlations between **total arsenic levels** (in log10 scale) and cell type proportions.
