# Supplementary material for: Comparison of different cell type correction methods for genome-scale epigenetics studies
Source: PubMed Central journal article supplement (PMC5391562; doi:10.1186/s12859-017-1611-2), 2017-04-14
Supplement: 12859_2017_1611_MOESM2_ESM.pdf [file 12859_2017_1611_MOESM2_ESM.pdf]

## Supplemental Material 2

A complete list of enriched GO categories and KEGG pathways statistically significant at false discovery rate of 0.05.

**1) Prenatal arsenic exposure and DNA-methylation data**

GO categories: (1) transcription, (2) regulation of transcription, (3) regulation of RNA metabolic process, and (4) DNA binding

KEGG pathways: endocytosis, cancer pathway and MAPK signaling pathway.

**2) An example data by the Fast-LMM-EWASher package**

GO categories: (1) integral to plasma membrane, (2) intrinsic to plasma membrane, (3) plasma membrane part.

KEGG pathways: (1) Pathways in cancer, (2) MAPK signaling pathway, (3) Regulation of actin cytoskeleton, (4) Neuroactive ligand-receptor interaction, (5) Cell adhesion molecules (CAMs), (6) Calcium signaling pathway, (7) Cytokine-cytokine receptor interaction, (8) Jak-STAT signaling pathway, (9) Hematopoietic cell lineage, (10) Complement and coagulation cascades, and (11) Melanoma.
