# Supplementary material for: Comparison of different cell type correction methods for genome-scale epigenetics studies
Source: PubMed Central journal article supplement (PMC5391562; doi:10.1186/s12859-017-1611-2), 2017-04-14
Supplement: 12859_2017_1611_MOESM5_ESM.pdf [file 12859_2017_1611_MOESM5_ESM.pdf]

**Supplemental Material S5.**

**Summary of sensitivity, specificity of FaST-LMM-EWASher, RefFreeEWAS, RefFreeCellMix, ReFACTOR, SVA, as well as results when “latent factors” were not adjusted.** Results were based on 100 simulated data across three settings ( $\rho=0, 0.3,$  and  $0.7$ ) each with different numbers of important CpGs (50, 100, and 150).

|                       | Number of Important CpGs =50      |                 |                 |                                   |                     |                     |
|-----------------------|-----------------------------------|-----------------|-----------------|-----------------------------------|---------------------|---------------------|
|                       | Sensitivity(Median, 95% interval) |                 |                 | Specificity(Median, 95% interval) |                     |                     |
|                       | $\rho=0$                          | $\rho=0.3$      | $\rho=0.7$      | $\rho=0$                          | $\rho=0.3$          | $\rho=0.7$          |
| <b>Unadjusted</b>     | 0.96(0.47, 1)                     | 1(1,1)          | 1(1, 1)         | 1(0.987, 1)                       | 0.21(0.00, 0.99)    | 0(0, 0)             |
| <b>Ewasher</b>        | 0(0, 0)                           | 0(0, 0)         | 0(0, 0)         | 1(0.999, 1)                       | 1(0.999, 1)         | 1(0.999, 1)         |
| <b>RefFreeEWAS</b>    | 1(0.96, 1)                        | 0.982(0.437, 1) | 0(0, 0.494)     | 0.997(0.994, 0.999)               | 0.996(0.993, 0.999) | 0.579(0.055, 1)     |
| <b>SVA</b>            | 1(0.98, 1)                        | 1 (0.98, 1)     | 1(0.96, 1)      | 0.998(0.996, 1)                   | 0.998 (0.996, 1)    | 0.998(0.996, 1)     |
| <b>Refactor</b>       | 1(0.96, 1)                        | 1(1,1)          | 1(1, 1)         | 0.996(0.825, 1)                   | 0.042 (0, 0.711)    | 0(0, 0)             |
| <b>RefFreeCellMix</b> | 1(0.98, 1)                        | 1(1, 1)         | 1(1, 1)         | 0.997(0.993, 0.999)               | 0.983(0.930, 0.997) | 0.546(0.199, 0.923) |
|                       | Number of Important CpGs =100     |                 |                 |                                   |                     |                     |
| <b>Unadjusted</b>     | 0.98(0.664, 1)                    | 1(1, 1)         | 1(1, 1)         | 0.999(0.976, 1)                   | 0.205(0.000, 0.981) | 0(0, 0)             |
| <b>Ewasher</b>        | 0(0, 0)                           | 0(0, 0)         | 0(0, 0)         | 1(0.999, 1)                       | 1(0.999, 1)         | 1(0.999, 1)         |
| <b>RefFreeEWAS</b>    | 1(0.965, 1)                       | 0.98 (0.392, 1) | 0(0, 0.403)     | 0.995(0.991, 0.998)               | 0.994(0.991, 0.998) | 0.52(0.014, 1)      |
| <b>SVA</b>            | 1(0.99, 1)                        | 1 (0.99, 1)     | 0.99(0.965, 1)  | 0.996(0.993, 0.999)               | 0.996(0.993, 0.998) | 0.996(0.993, 0.999) |
| <b>Refactor</b>       | 1(0.965, 1)                       | 1(1,1)          | 1(1,1)          | 0.994(0.808, 0.998)               | 0.042 (0, 0.695)    | 0(0, 0)             |
| <b>RefFreeCellMix</b> | 1(0.975, 1)                       | 1 (1,1)         | 1 (1,1)         | 0.988(0.968, 0.996)               | 0.889(0.685, 0.976) | 0.211(0.047, 0.525) |
|                       | Number of Important CpGs =150     |                 |                 |                                   |                     |                     |
| <b>Unadjusted</b>     | 0.993(0.723, 1)                   | 1 (1, 1)        | 1 (1, 1)        | 0.999(0.965, 1)                   | 0.204(0.000, 0.972) | 0(0, 0)             |
| <b>Ewasher</b>        | 0(0, 0)                           | 0(0, 0)         | 0(0, 0)         | 1(0.999, 1)                       | 1(0.999, 1)         | 1(0.999, 1)         |
| <b>RefFreeEWAS</b>    | 0.993(0.973, 1)                   | 0.98(0.318, 1)  | 0(0, 0.294)     | 0.992(0.986, 0.997)               | 0.992(0.986, 0.999) | 0.496(0.013, 1)     |
| <b>SVA</b>            | 1(0.993, 1)                       | 1(0.993, 1)     | 0.993(0.970, 1) | 0.992(0.988, 0.996)               | 0.992(0.989, 0.996) | 0.993(0.988, 0.996) |
| <b>Refactor</b>       | 1(0.98, 1)                        | 1(1,1)          | 1(1,1)          | 0.989(0.794, 0.997)               | 0.042 (0, 0.674)    | 0(0, 0)             |
| <b>RefFreeCellMix</b> | 1(0.983, 1)                       | 1(1,1)          | 1(1,1)          | 0.975(0.929, 0.993)               | 0.744(0.471, 0.939) | 0.098(0.022, 0.293) |

**Footnote:**  $\rho$  = correlation between primary covariate and latent variables.  $\rho = 0$  corresponds to data simulated from Scenario 1, while  $\rho=0.7$  corresponds to data simulated from Scenario 2.
